# Supplementary material for: Wall-like hierarchical metal oxide nanosheet arrays grown on carbon cloth for excellent supercapacitor electrodes
Source: Royal Society of Chemistry journal article supplement (doi:10.1039/c6nr04020a), 2016-01-01
Supplement: c6nr04020a1.pdf [file c6nr04020a1.pdf]

Electronic Supplementary Material (ESI) for Nanoscale.

This journal is © The Royal Society of Chemistry 2015

**Wall-like hierarchical metal oxide nanosheet arrays grown on carbon  
cloth for excellent supercapacitor electrodes**

Zongyu Huang<sup>a,b, ‡</sup>, Zhen Zhang<sup>b, ‡</sup>, Xiang Qi<sup>a,b</sup>, Xiaohui Ren<sup>b</sup>, Guanghua Xu<sup>b</sup>, Pengbo Wan<sup>c,\*</sup>,  
Xiaoming Sun<sup>c</sup>, Han Zhang<sup>a,\*</sup>

*<sup>a</sup>SZU-NUS Collaborative Innovation Center for Optoelectronic Science and  
Technology, Key Laboratory of Optoelectronic Devices and Systems of Ministry of  
Education and Guangdong Province, College of Optoelectronic Engineering,  
Shenzhen University, Shenzhen, P. R. China*

E-mail: [hzhang@szu.edu.cn](mailto:hzhang@szu.edu.cn)

*<sup>b</sup>Hunan Key Laboratory of Micro-Nano Energy Materials and Devices, Laboratory  
for Quantum Engineering and Micro-Nano Energy Technology and School of Physics  
and Optoelectronics, Xiangtan University, Hunan 411105, P. R. China*

*<sup>c</sup>State Key Laboratory of Chemical Resource Engineering, P.O. Box 98, Beijing  
University of Chemical Technology, Beijing 100029, P.R. China*

E-mail: [pbwan@mail.buct.edu.cn](mailto:pbwan@mail.buct.edu.cn)

<sup>‡</sup>This authors contributed equally.

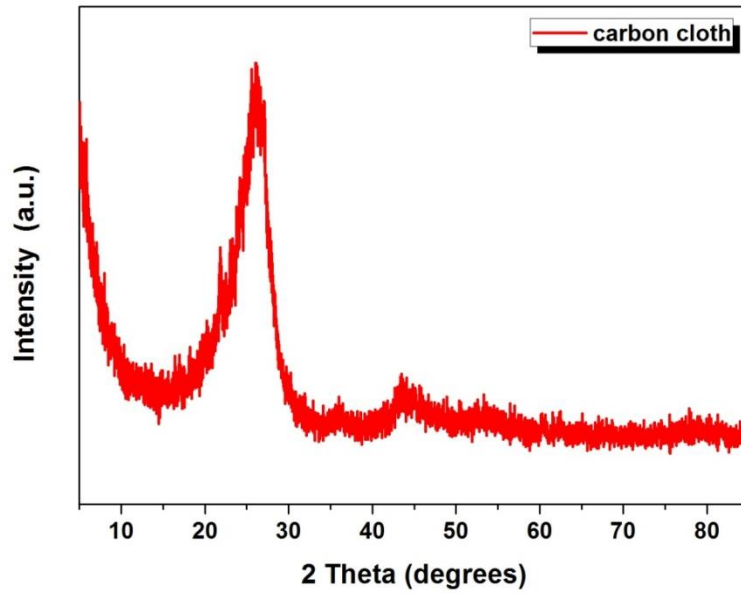

**Fig. S1** XRD pattern of pure carbon cloth substrate.

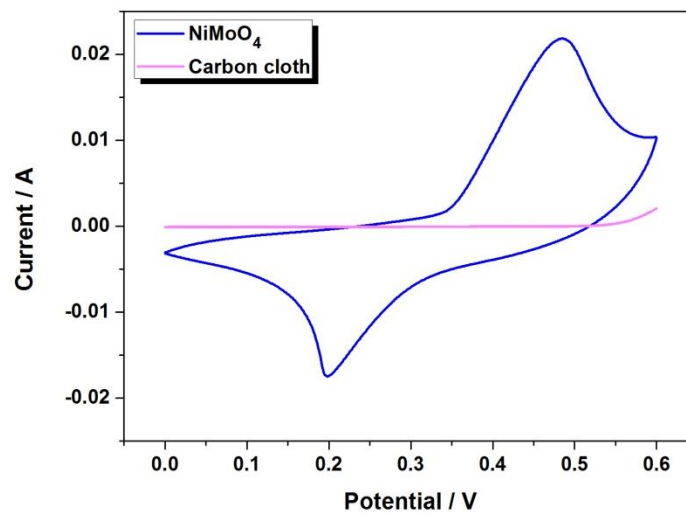

**Fig. S2** The comparison of the NiMoO<sub>4</sub> nanosheets and bare carbon cloth at the scan rate of 10 mV/s.

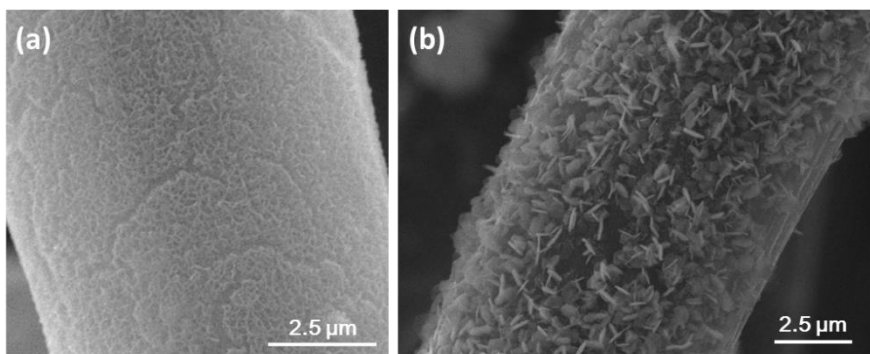

**Fig. S3** SEM images of NiMoO<sub>4</sub> and CoMoO<sub>4</sub> electrodes after cycling test.
